# Supplementary material for: Improving Signal-Strength Aggregation for Mobile Crowdsourcing Scenarios
Source: MDPI journal article supplement (doi:10.3390/s21041084), 2021-02-05
Supplement: s1 [file s1]

# RMSE Figures With Higher Number of Measurements

## Improving Signal Strength Aggregation for Mobile Crowdsourcing Scenarios

Diego Madariaga, Javier Madariaga,  
Javier Bustos-Jiménez, and Benjamin Bustos

NIC Chile Research Labs, University of Chile  
Contact: [diego@niclabs.cl](mailto:diego@niclabs.cl)

### 6 Experimental Results

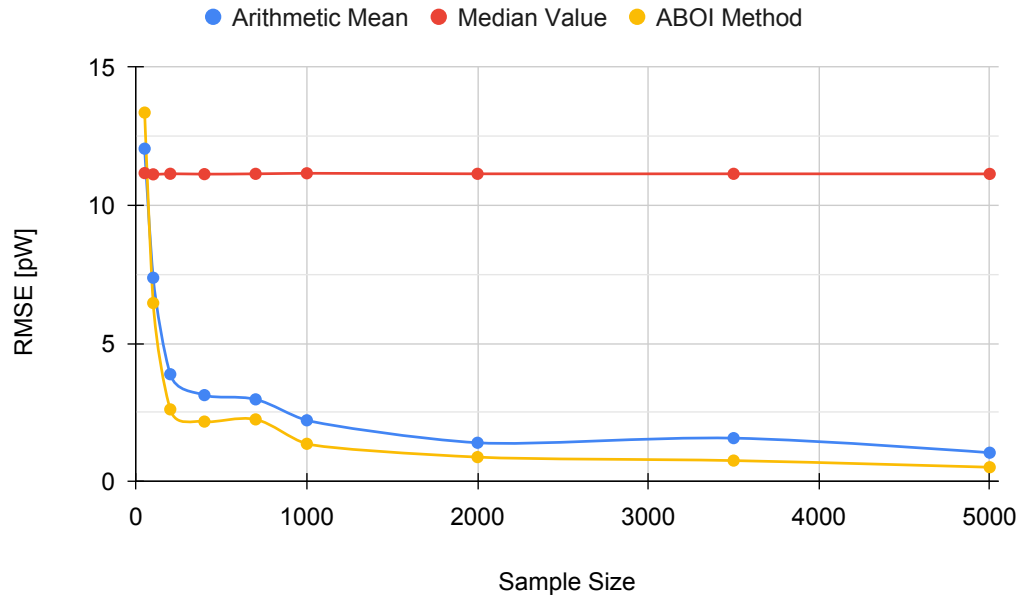

**Fig. 5.** Simulated scenario. RMSE for  $\bar{P}_A$  prediction for different sample sizes with uniform distribution.

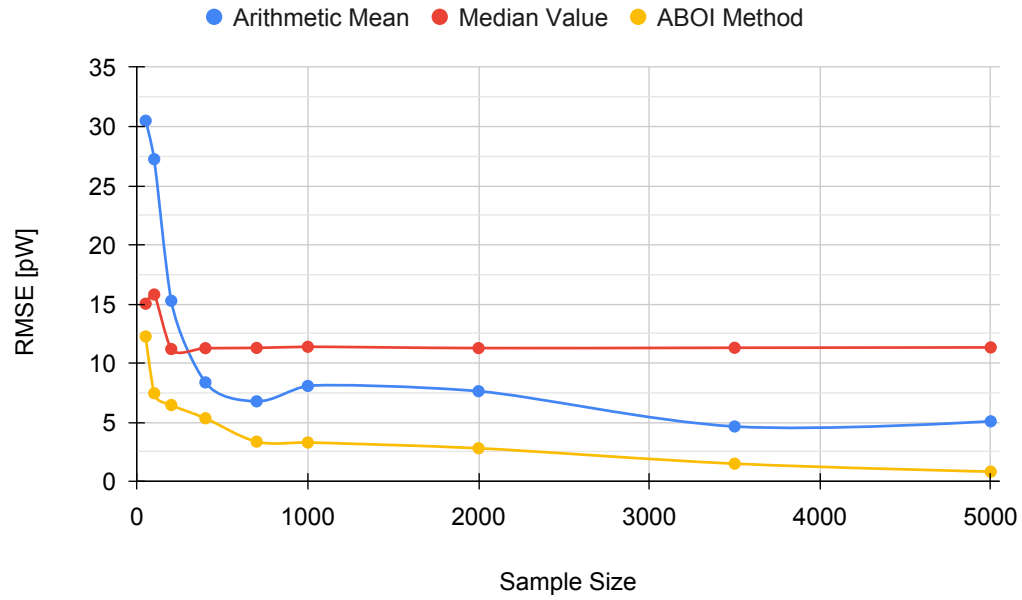

**Fig. 7.** Simulated scenario. RMSE for  $\bar{P}_A$  prediction for different sample sizes with distribution based on social network theory.

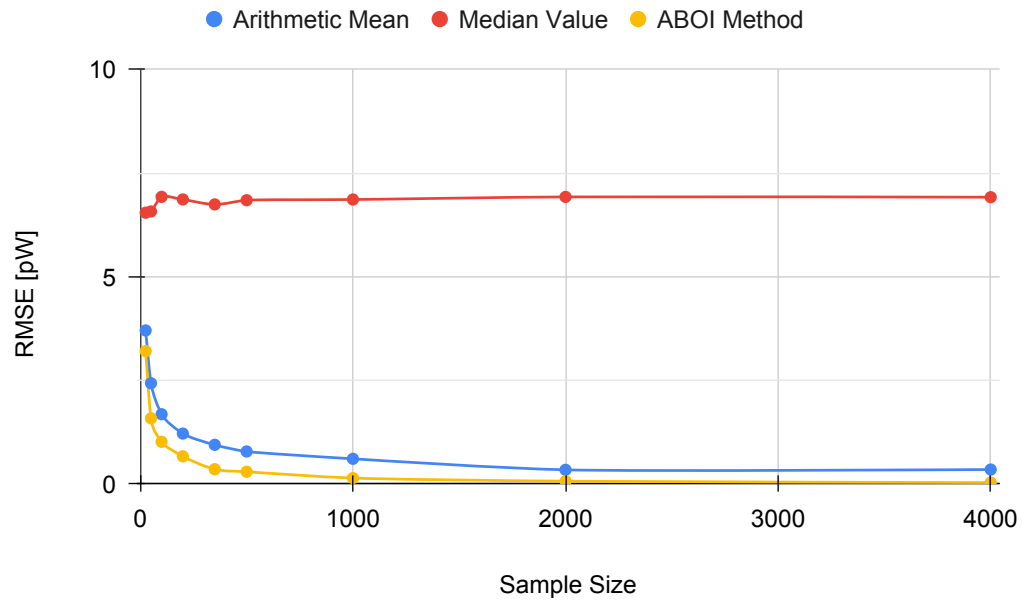

**Fig. 10.** Real scenario. RMSE for  $\bar{P}_A$  prediction for different sample sizes with uniform distribution.

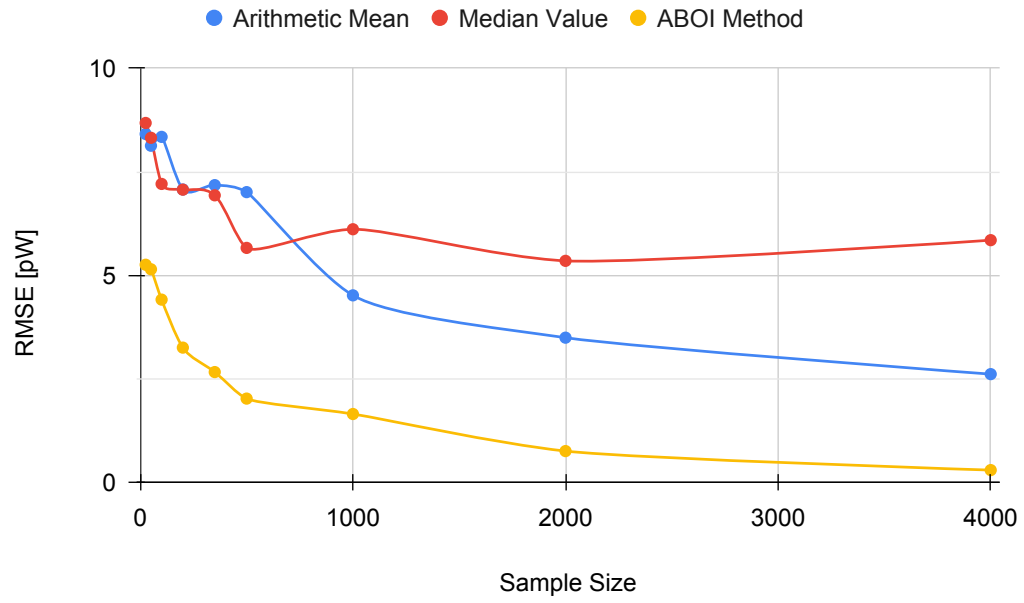

**Fig. 12.** Real scenario. RMSE for  $\bar{P}_A$  prediction for different sample sizes with distribution based on social network theory.
